# Supplementary material for: Nicotinamide Mononucleotide Administration Amends Protein Acetylome of Aged Mouse Liver
Source: MDPI journal article supplement (doi:10.3390/cells11101654), 2022-05-16
Supplement: s1 [file s1]

Supplementary Materials

# Nicotinamide Mononucleotide Administration Amends Protein Acetylome of Aged Mouse Liver

Chengting Luo <sup>1,2,†</sup>, Wenxi Ding <sup>1,2,†</sup>, Songbiao Zhu <sup>1,2</sup>, Yuling Chen <sup>2</sup>, Xiaohui Liu <sup>2</sup> and Haiteng Deng <sup>2,\*</sup>

<sup>1</sup> Tsinghua-Peking Center for Life Sciences, Tsinghua University, Beijing 100084, China; luoct@mail.tsinghua.edu.cn (C.L.); dwx18@mails.tsinghua.edu.cn (W.D.); zhulongbiao@mail.tsinghua.edu.cn (S.Z.)

<sup>2</sup> MOE Key Laboratory of Bioinformatics, Center for Synthetic and Systematic Biology, School of Life Sciences, Tsinghua University, Beijing 100084, China; chenyling2016@mail.tsinghua.edu.cn (Y.C.); xiaohui2013@mail.tsinghua.edu.cn (X.L.)

\* Correspondence: dht@mail.tsinghua.edu.cn

† These authors contributed equally to this work.

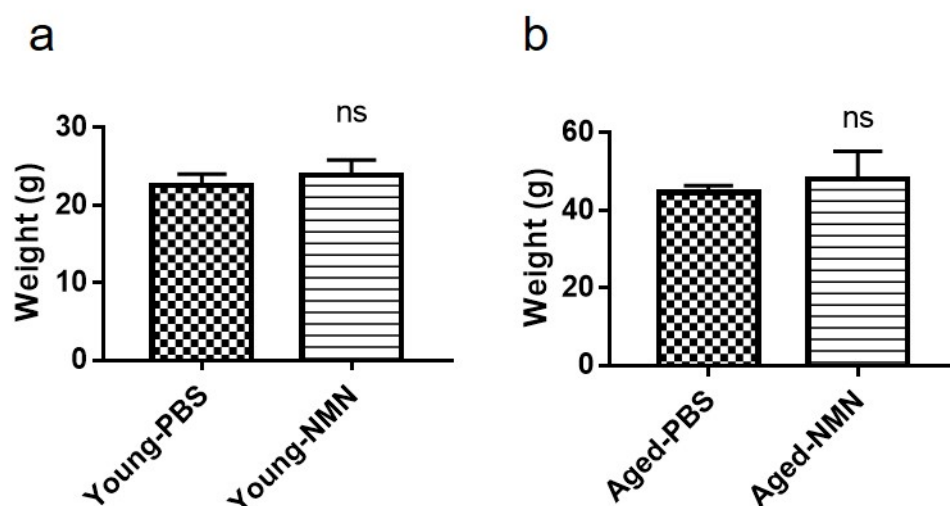

**Figure S1.** NMN administration did not change bodyweight of young (a) and aged mouse (b). Data were expressed as mean  $\pm$  SD,  $n = 4$ .

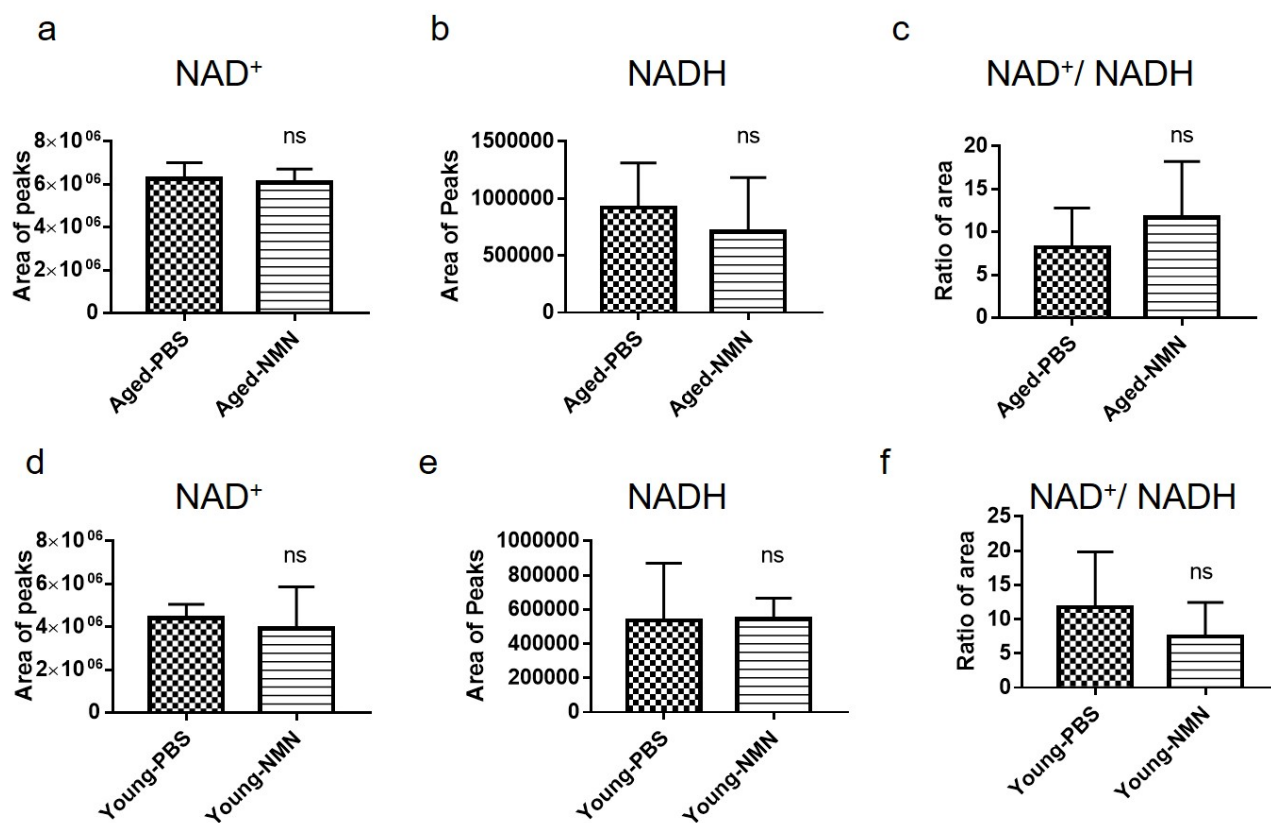

**Figure S2.** NMN did not change NAD<sup>+</sup> and NADH level or ratio of NAD<sup>+</sup>/NADH in aged (a–c) and young (d–f) mouse livers. Data were expressed as mean ± SD, *n* = 4. Young-PBS: young mice treated with PBS, Aged-PBS: aged mice treated with PBS, Aged-NMN: aged mice treated with NMN.

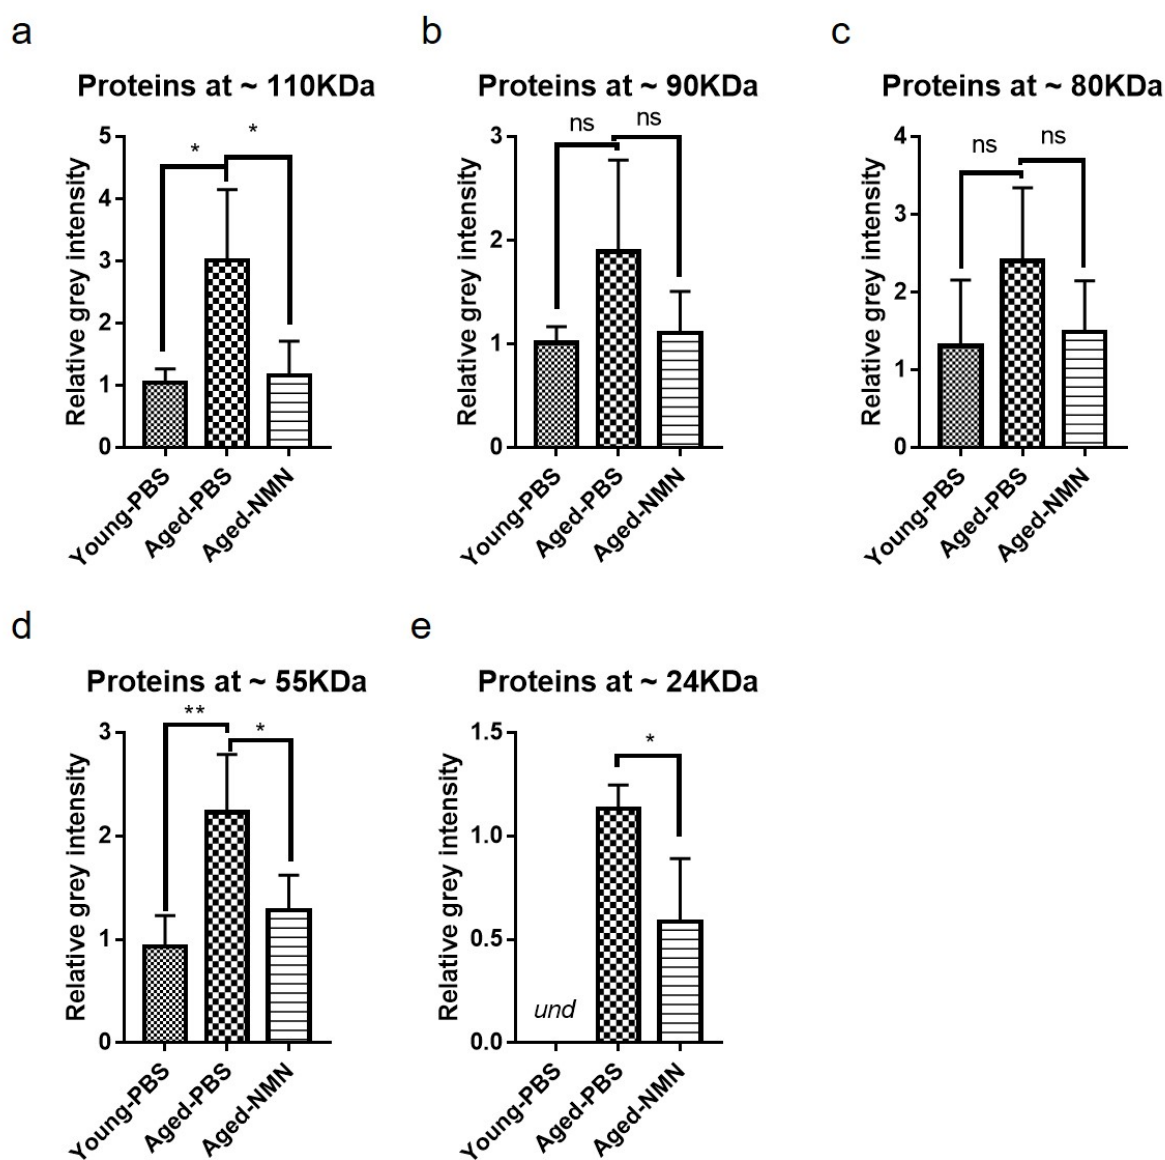

**Figure S3.** Quantification of acetylated proteins from liver sample related to Figure 1b. The intensity of selected bands was quantitated with Image Lab. Data were expressed as mean  $\pm$  SD,  $n = 4$ .

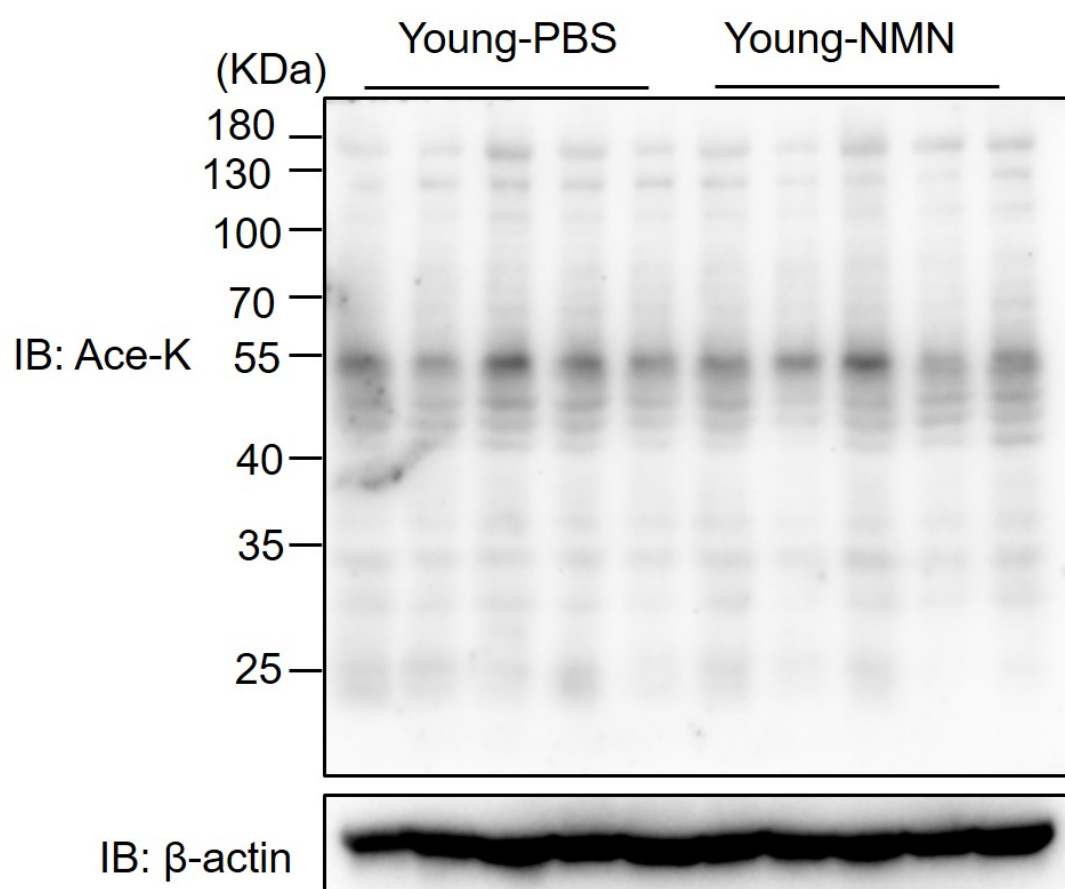

**Figure S4.** Representative image of western blot of young liver proteins treated with equal volume of PBS or NMN (intraperitoneally injected, 500 mg/kg body weight every other day for 4 weeks), probed against acetylated-lysine.

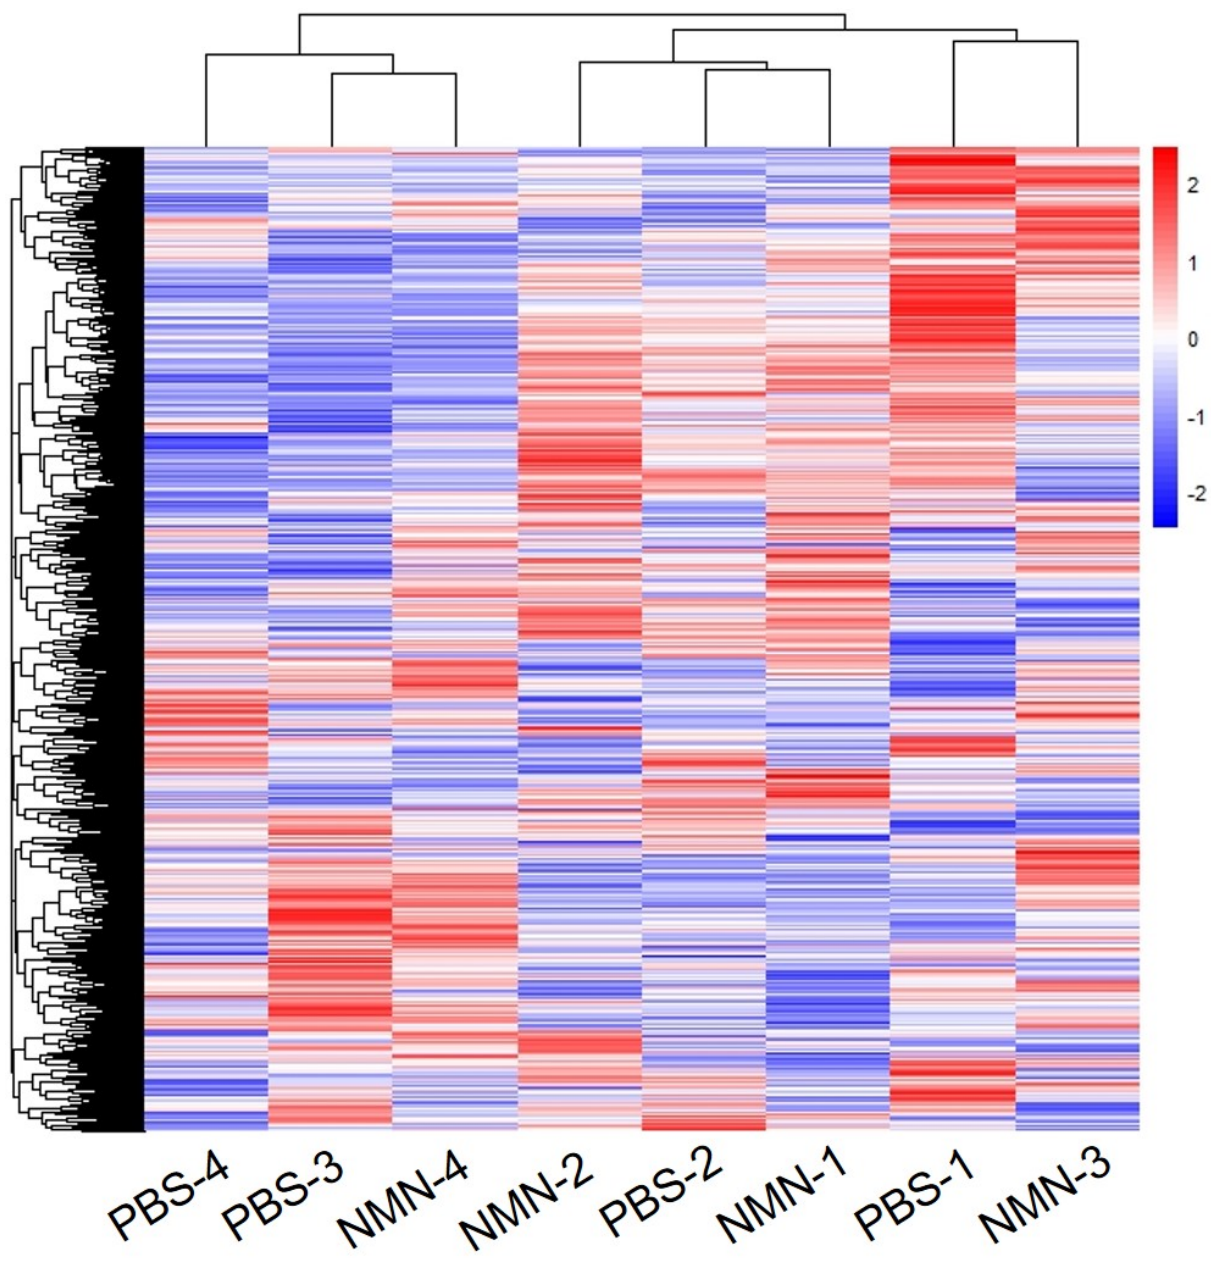

**Figure S5.** NMN treatment did not dramatically affect protein expression level. Quantitative proteomic analysis identified 5587 proteins from aged-PBS than aged-NMN liver and heat map analysis showed NMN treatment did not dramatically affect protein expression level. PBS: aged-PBS, NMN: aged-NMN,  $n = 4$ .

a

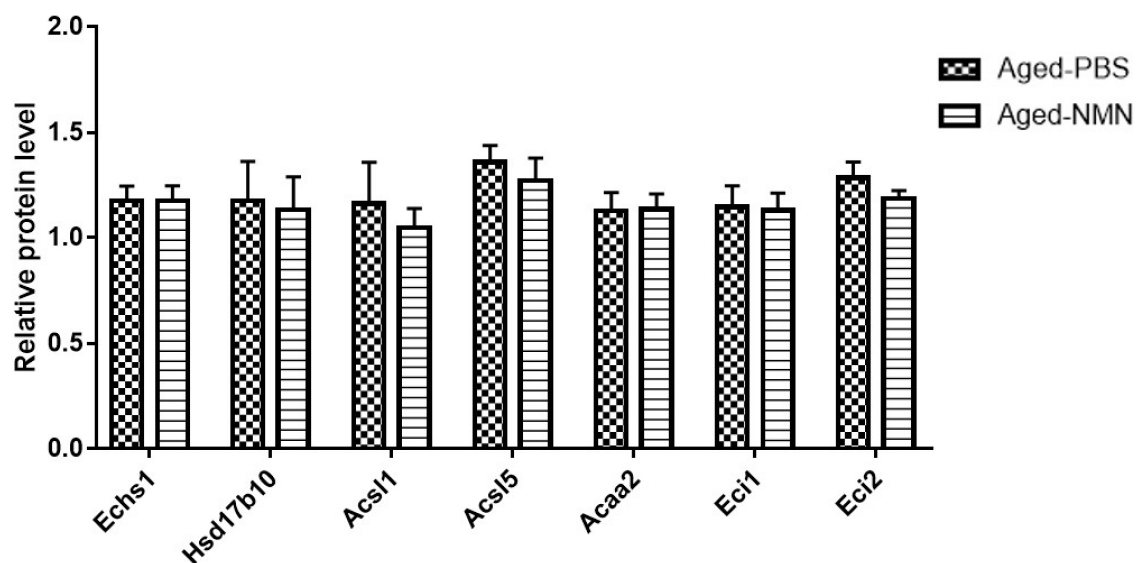

b

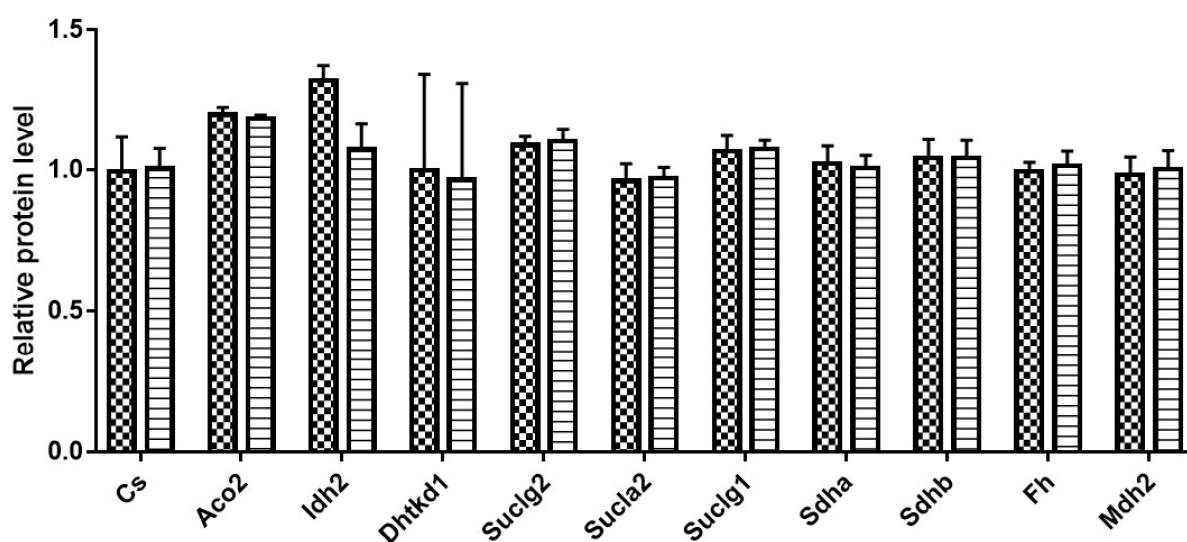

**Figure S6.** Quantitative proteomic analysis showed that expression levels of enzymes catalyzing fatty acid  $\beta$  oxidation (a) and participating TCA cycle (b) were not changed by NMN treatment.  $n = 4$ . Young-PBS: young mice treated with PBS, Aged-PBS: aged mice treated with PBS, Aged-NMN: aged mice treated with NMN.

**Table S1.** peptides were relatively higher acetylated from aged-PBS liver than young liver.

**Table S2.** peptides were relatively lower acetylated from aged-PBS group than young group.

**Table S3.** among peptides with increased acetylation from aged-PBS liver compared with young liver, peptides were decreased by NMN supplementation.

**Table S4.** among peptides with increased acetylation from aged-PBS liver compared with young liver, peptides were increased by NMN treatment.
